# Supplementary material
Source: publisher site journal article supplement (https://www.dovepress.com/article/575860)
Supplement: Supplementary file 1 [file 575860%20Supplementary%20Material.doc]

Supplementary Material: Summary of Quality Control for Herbal Materials

Introduction:

This summary provides key quality control (QC) information for the herbal materials used in this study. All materials were procured from certified commercial suppliers and complied with the quality standards of the Pharmacopoeia of the People's Republic of China (2020 Edition). The identity of all materials was verified by TCM pharmacists at the Maternal and Child Health Hospital of Hubei Province. Representative voucher specimens are retained in the hospital's herbarium. Detailed QC reports are available from the corresponding author upon reasonable request.

Table: Quality Control Summary of Investigational Herbal Materials

| Herbal Name (Latin) | Common Name (Pinyin) | Batch Number | Key QC Metrics | Result |
| --- | --- | --- | --- | --- |
| Aconitum carmichaelii (Prepared) | Chuan Wu | D22050202 | Diester Alkaloids Content; 33 Pesticide Residues | 0.080%; Complies |
| Aconitum kusnezoffii (Prepared) | Cao Wu | D21080102 | Diester Alkaloids Content; 33 Pesticide Residues | 0.032%; Complies |
| Angelica sinensis | Dang Gui | G01220614-02 | Water Content; 33 Pesticide Residues | 8.9%; Complies |
| Clematis chinensis | Wei Ling Xian | B22060201-01 | Oleanolic Acid Content; Water Content; 33 Pesticide Residues | 1.01%; 11.3%; Complies |
| Cortex Erythrinae | Hai Tong Pi | A220501 | Water Content; 33 Pesticide Residues | 6.8%; Complies |
| Cyathula officinalis | Chuan Niu Xi | B22062101-01 | Cyasterone Content; Water-soluble Extract; Water Content | 0.069%; 65.6%; 8.9% |
| Glycyrrhiza uralensis (Prepared) | Gan Cao | G04230203 | Glycyrrhizin Content; Liquiritin Content; 33 Pesticide Residues | Complies*; 0.77%; Complies |
| Luffae Fructus Retinervus | Si Gua Luo | B22091401-01 | Water Content; 33 Pesticide Residues | 5.7%; Complies |
| Speranskia tuberculata | Tou Gu Cao | B22101503-01 | Water Content; 33 Pesticide Residues | 11.0%; Complies |
| Spatholobus suberectus | Ji Xue Teng | D22110101 | Water Content; Alcohol-soluble Extract; 33 Pesticide Residues | 10.5%; 19.6%; Complies |
| Zanthoxylum bungeanum | Hua Jiao | A220501 | Volatile Oil Content; Water Content; 33 Pesticide Residues | 9.3%(ml/g); 9.3%; Complies |

Notes:

"Complies" indicates that the material passed all relevant tests as per the Chinese Pharmacopoeia, including, where required, screening for 33 prohibited pesticide residues where the results were "Not Detected".

*For Prepared Licorice (Gan Cao), the standard requires a minimum of 0.50% for Liquiritin and 1.0% for Glycyrrhizin. The provided report confirms compliance for Liquiritin (0.77%) and cites data for Glycyrrhizin compliance from a subsidiary report.
